# Supplementary material for: A Study of Adult Olfactory Proteins of Primitive Ghost Moth, Endoclita signifer (Lepidoptera, Hepialidae)
Source: MDPI journal article supplement (doi:10.3390/life13122264), 2023-11-27
Supplement: s1 [file s1]

# A Study of Adult Olfactory Proteins of Primitive Ghost Moth, *Endoclita signifer* (Lepidoptera, Hepialidae)

Guipeng Xiao <sup>1</sup>, Jintao Lu <sup>2</sup>, Zhende Yang <sup>2</sup>, Hengfei Fu <sup>2,\*</sup> and Ping Hu <sup>2,\*</sup>

Additional file S1 Nucleic acid sequences of all candidates' olfactory proteins identified in *Endoclita signifer* antennal transcriptome

## EsigOBP11

ATTCTTATTTTACAAATTGCAGGCGACTTGGCCAACGACCTTGGCAATAACAATTGGAGA  
CTGCTCTACCGGGAGATGCTGCCCCGTCGCTCAACGCAATTGGGATAAGAGCGGCAAAAGA  
GTTGGCCACAACTGTTTCTGAAGGTTCCCTACAACCAACTGTTCCCCACGTCGGGTAA

## EsigOBP12

ATGTGGAACATATGTTGGTTTTGGTGGTGGTCGCTCGAGCTGAAGTGGAATGGCCCAGT  
CAATCTTTTCTGGACCAGATGCAGCCTATTCTAGAAAAGTGCTTATCGGAAAATCCAGTA  
GACGCAGGTGTTTTAGAAAAAGCAAAAGCAGGCGATTTGGGCGGCGACCCAGATTTGAAG  
AAACTTTTGCTATGCAATTTGACATGGAAGGAGTGATCGACCACGATACTGGAGAGATA  
TTTTACTACAACTGCTGGACATGCTGCCAAACCAGGAGACCAAACGGCACGTGTTTGAG  
ATGATAAAGCTTTGCATCGGCATACACAACCCGGCAGCGCAGGACACGGCGCTGCAATTC  
GCCAGATGCATGAGGGACAAAGGCAGTCCTTTCTTCTTTATCTAA

## EsigOBP13

ATGAAGATTGTTATCGTGATGTTGTGTACCATTGTGGGCATTTGGGCCCCAAGACAAGAAG  
CTCATCGCCGAGGAGCTGATGTTGGAGCACATCCACGACGAGTGCCAAGCCGACCCGGCC  
ACCTACGCCGACCACGAGCTCCTCCACCACCTCTCAGAGAACATCGACAACCCCCAAGTA  
GGCGCCACATGCTCTGCGAATCTACCAAGGTAGGACTGCAGAAGGAGAACGGGGAATTG  
GATATCCCCACCATCAAGGAGAAGATCGGCCTTACAGTCCAGGATCCCGACAGAGTGGAG  
TTCCTGGTGAAGGAATGCGCCATTAAGAAGAACACTCCGGAGAAGACCGCCATCAATCTC  
TTC

## EsigOBP14

ATGTTTAAGGGCATAATCTATATTTTGGCAGGTTGTCTCGTTTTTTCGAGTATTAGTGGA  
GAAGAGTTTCTACTCAAGAACTGATCGACATGTTGGCACCAGTGGTGAGCAAATGCGAA  
GAGATAACTGGCGTAGACAAAGATCTCGTTACTCATTCTCCGAGGGTCGCATGCCGGAT  
GACCCCGCACTGAAGTGTTACATGAAGTGTATTTTGTGGAATTCGAAGTGCTCGACATT  
CAAACTGGAACATTTCACTACGAGAAGATGCTGGATGCGATACCGGAATCCATGAAAAAG  
ATAGCCTATAACATGGGCAAGGACTGTATCCACTTCAAGGGCGAGGGAGGCAGTGACCTC  
TGTCAGTGTCTTATGATCTTCATAAATGTTGGCAACAGGCTGATCCTGAACATTATTTTC  
TACTGTAG

**EsigOBP15**

ATGCTTTTGCATACGGTTATATCTTTTGTGCTTATATTTTCGACTAACGCTCTGAAATGC  
AACACGGATAAAGGACCAAACGAAGAAGAAATGAAAAGTGTATTAATGAATTGCATGAGG  
AAACTTGGGCTTCCACTACCTGGACAACCTTGATGTGCTAGGAGATGGCAATTTTTCTATG  
GAATATAATAAAGAAACATCTAATGGCGAAATTTCCAGTAATAAAGGCCACTCATTGAAT  
TACAGAAGAGCTGTCATACCTTCTCACAGACGTTACAACCGTGACACAAGCCATGGAAC  
ATGACGACAAACACAGGACAGAGGAGCCAATATAATCCAAACATAGCAACTAGATTTGAT  
CACGACAGTTCAGGCAGTGAAGAATCCGATTACGGTACTAATAATCAAGATTTAAATGAC  
AGCAATCGTACCGAATTCATAAATAACAATTCATATGATGTACTACGAAAAAAGGCCTGT  
GTCACACATTGCTTTTCTGCAGGACTTTCAAATGACCAGTGAGAATGAAATGCCTGACAGG  
CATCTGATGGCAAACCTTTATGACTCGAGACATGAGCAATAAAGAATATAAAGATTTTGTA  
AATGAATCCATTGAAGACTGTTTTAACTTATACAAATAGAAAAATATCACGGACAAATGT  
GAATTCTCCAAGAATATCTTCAAATGTATTTAGAGAAAGGTCGTGCAAATTGCGACGAT  
TGGAGTGAACGTATTTCCTTTTTTTAA

**EsigOBP16**

ATGAAGGCTGTTGTTGTTTTTTTGTGTGCCATCGTCGCAGGAGTTTTGGCTCAACTTCCT  
GACAGCGAACGGGTATTCCTGAAACAAGTCCACGATTCCTGCCAAGCCGACCGCGCCACC  
TACGCCGACGAGAGCCGCTGAAGCAGCTCAGCAAGTACATCGACGACCCCGTCATAGGC  
AAACATATGCTGTGCATGTCCCAGAAGGCGGGTCTTCAGAAGGGGAATGGCGACCTGGAC  
ATCGCCGTTATCAAAAAGAAGATCGACCTCGTGACTCCTGACAAGTCCAAGGTGGACGGT  
TTGGTCAAGAAGTGCGCCGTTGTCAACGGGAATCCCGGGAGGACCGCCAACCTTGCTCTGG  
CTGTGTTTC

**EsigGOBP8**

ATGAAGTTAATTGTGCAATGCCTCGCGTATATTCTTCTAGTGATATGCCACAGCGCATT  
GCAGTCTCTGACGAGGAAGTCAAGGCTAAATTCATGCAAACAGTACTCGAATGTATGAAA  
AAGACGCCGCTTACGCCAGACGATATGACTTCGTTGAAAAATCATATCATACCAGAGACG  
GGAAATGCCAAGTGCGTTTTTGGCCTGCGCCTATAAAAGCATAGGTGTCATCGACGAAAAG  
GGATTGTTTACTGGAGAAGGAGGTATGAAGGTCGCTAACAGATTATTTCCCGGGAGACGAC  
GAGAAATTGAAGAAATCTAAGGAATTTGTAAACATTTGCAGCACAAATAAACGAACCA  
GTGTCAGACGGTGTAAGCGGATGTGATCGTGCTGGCCTACTGTTCAAATGTGTCAGGATA  
AATGGACCCAAACTTGGATTCCGAATTTGA

**EsigGOBP9**

ATGACTGGAGTACAATTGTTGTTCGCTGCCTGTATGGTGCTCGTGGGATCGGTTTCAGTGC  
TACTCCGAGGACGAAGTAAAAGCGAAGGGTACAGAGCTATTTCTGCAGTGTGCAGAAGGT  
CAGACCGTGGCAAAGGAAGACTTAGAAAACTGGAGAAACAGGAGTTACCGGAAAATGAT  
AACGTTAAGTGTATATTGGCCTGTCTTTACAGAAAATTCAATGCTATCGATGACCAAGGC  
TTATTCACGCCAGAAAAGGAATCGGAAACTGGACGGGAACCTATACGCCGGTGCCCT

**EsigGOBP10**

ATGTTTACCGTTGTTTCGATAAATTTATCTATACTTCTCATATTGACGGTCTTGAAAAA

AATGTTGCACTAGGCTATACATGTGGCTCACCTCCTAGTATGAACATGCAGATCTGTTGC  
AATGGATTAAATTTTGTAGATAAAGCCATTAAGGAGGAGTGCATGGAGGAAATTAAGGGC  
TCACCGGCTTCAGAAATATACTGCAATAAAATCAACTGCTTGCTTAAAAAAAAACGCTTT  
GTACAAGATGACGGAGCAGTAGACTTACCAGCAATAACTGCACACGTGAGCAAGTGGGTC  
GGGGAGAATCCCGAATGGTCGACCTTGCCAGCGGTAATCAACGACGAATGTTTCACAGAC  
AAATTATCGCAGCTAGAATTTAAGCCCAGCTGTCAAAAAACAAGGTGTTTTACTGTATC  
GCACGTAAAGTCCTCGTGTTATGTCCCCTAGCCGCTGGACTGATTCCGCTGAATGTAAT  
GAGATTAAGAAGTACTTGGAGGAGTGCAAATAA

#### EsigOBP11

ATGGTTCGAAAAAGTAGTGTGATATTGTGTTTTTTGGTGTGTGTTAATTTTGAATCTCG  
TTGTCTAGCAGCGCTATATCATCGGAAAGCGAAAAGCGATGCAGGAACCCGCCGACGGCG  
CCGCAGAAGATCGAGCGGGTGATTACGCAGTGTCAAGATGAAATTAATAATCCATCCTT  
CGAGAGGCGCTGGACGTCATAAAGGAGGAGCACACGATGCCGCAGAAGCGGACGCGCAAC  
AAGAGGGAGGTGCCCTTCACGCACGACGAGAAGAGGATTGCTGGATGCCTGCTGCAGTGC  
GTCTACAGGAAAGTGAAAGCGGTTGACGGGTACGGCTTCCCGACGCTCGAGGGCCTGGTG  
CGGCTCTACTCGGACGGCGTGAACGAGCGCGGCTACTTCATGGCGACGCTCGAGGGCTAGC  
CGCGATTGCCTCATGAGGAACACGACAAGTTCTCCAGGACCGTTCCCATGGATAACGGA  
CGCAACTGCGACGTGTCCTTCGACATTTTCGAGTGCATCTCGGACAGGATCGGCGAATAC  
TGCGGCAACAACGGCCTGTGA

#### EsigGOBP12

ATGTTTTGTCTGGTTTTTCGTGGCTGGTTTTGAATTTGGTGTCTTTCAAAGCCAGATGGACTT  
ATCATGAAAACATCAGCGTTGGCTTCGAAAAAGCTTTGGATGAATGCCGTGAGGAGAGT  
AATCTAACACCGGAAATAATGGAAGAGTTCCTCCACTTCTGGAGGGACGACTTTGAGATC  
AAGCACCGGGAGCTGGGTTGCGCCATCCTCTGCATGAACAAGAAGTTCGATCTCCTGCAG  
GACAACCAGAGGATGCATCACGGGAACATGGATGATTTTCATCAAATCCTTC

#### EsigGOBP13

GATGACAATGGTGTGTTCACTCCCGCACTGAGTGAGAAAGCTGGACGCGAGCTGTATGCT  
GGTGTCTCCCGAAGAAAAATTAATAAGCTCAAAGAAGTGAGCGAGACCTGCACGAAAGTA  
AACGACTTAACCGTAAGTGACGGTGCGAAGGGTTGTGATAGAGCAGGACACATCTTCAA  
TGCTCCACGAAGAAGCTAAGAAGGTGGGC

#### EsigGOBP14

AAAGCTTTGGATGAATGTCGTGAGGAGAGTAATCTAACACCGGAAATAATGGAAGAGTTC  
CTCCACTTCTGGAGGGACGACTTTGAGATCAAGCACAGGGAGCTGGGTTGCGCCATCCTC  
TGCATGAACAAGAAGTTCGATCTCCTGCAGGACAACCAGAGGATGCATCACGGGAACATG  
GATGATTTTCATCAAATCCTTCCACCAGGGCGAGAAGTTGGCCCGTCGCATCATC

#### EsigGOBP15

GAAATAATGGAAGAGTTCCTCCACTTCTGGAGGGACGACTTTGAGATCAAGCACCGGGAG  
ATGGGTTGCGCCATCCTCTGCATGAACAAGAAGTTCGATCTCCTGCAGGACAACCAGAGG  
ATGCATCACGGGAACATGGATGATTTTCATCAAATCCTTCCACCAGGGCGAGAAGTTGGCC

CGTCGCATCATCGAAATC

**EsigPBP1**

ATGAGCATTGAGGGTTCGAAGTTCAACGGGGCACCTGTGACAAATTCGACGACATCCGAT  
CCAGAAAGATCACTTATTGGAGATGATGACAACCCTAATGAGAATTCGGAGGCTTCTAGG  
GAGCTGGATTTGGACGAAGTAATGCGGGATTGCAACAATTCGTTTCCTATTAAATGGAA  
TACCTGACATCTCTTAACGAAAGTGGTAGCTTCCCAGACGAAACTGACAAGACGCCAAAA  
TGTTACATACGCTGTTATCTACAACGAACAGGAATTATGGACGCTGGTGGTCATCTGGAC  
GCAGAACGGGCCTCTGAGCTGCTGGCAGGTCCCCGACCTGGCCGTGAAATCACAGATCTG  
CCTGAGACAACAAGCGCGTGCACCGATCGAGATGAGAAATGCCTATGCGAGAGGGCGTAC  
GCCTTCATCCGTTGCGTCATGGAAGCTGAGATCGACCGGTACCACAATGGGCAATGA

**EsigPBP2**

ATGGCTTTCTTCAAGCTTTTCGCGTTTGCTGTTATTGTCGCTGCTATTAACGCCGCTCCCAGTGA  
CCCGACCGATCAGAAACAGACCTTACAGTCGATTGGCAAAGCATGTGCGGTGAAAACTCCGGTA  
ACTGACGAAGAATATCAAGAACTCTTGATAAAAAGCTTCCTACCACCAAGGACGCTAAATGTC  
TTTTGGCCTGCATCTACAAGACTGTAGGCATTCTGGGCGATGATGGGCTCATTTCCGAGGAAGG  
TTCCCTAGCCTGCGCAGAAAAGAAGTATAACGACGACCCAGTCAAAAAGGAGATCCTGTTGGAA  
GTTGTCAAGAATTGCCATAAAGTGAACCTCTGTGGCTGTGTCCGACGGAACCGACGGCTGTGAA  
CGAGCCACACTGAATCTTGAATGTATGCTCAACGAGAACAGCGCGATTGTGACCGGATTTCGACT  
AA

**EsigPBP3**

ATGCAGTGCAAATATGGTTTTAGAGAGCTTTTTTCGCTTATTTTTCTGGCGAATATTGCT  
CTAATTTTCGAGCAAGCCGGATAAGGAAGTAATGAAGGATGTAACCTATTGGCTTCGGCGAA  
GTGTTGGAAGAGTGCAGGGAAGAGAGCGGCCTGAAGGAGGACGTGATGGAGGAGTTTCGTC  
CACTTCTGGCGCGACAGTATCCAACACCGGGAGCTCGGCTGCGCTATCTTCTGCATGGGC  
AAGCGGCTGAAGGTGCTCGACGATCGTGGTCGCATGCACCACGAGAACGCGGACGCCTTC  
GTGAAGTCGTATCTAGAGGTGAAGTGATAGCCAAACAAGTGATATCCATAGCTGACAAC  
TGCGAGAAGAAGTTCGATAGTAACGATGACGACTGCGCGAGGATGCTGATGATAGCGCAG  
TGCTTCAAGGACGATTGTATCGAGGCTGGACTGGCTCCACGGTGGACATGCTGGTCGAA  
GTCATCCTTTAA

**EsigOR1**

TTTCAGCCGCAGCAAGTGGTGAAGAATGCAGCCAGGAATCTAACGGTCGTAACGTGGAGT  
GTTATATCAGTAGCATTGTCTATGGTCTTCTTTTGTGGCACAGCCCCATTGATATTTGAT  
TCTGATCTCAGACTGGATGCCGACAACGTGACGTGGATCACAAGTCGCCCGCTGCCTCTC  
AACACTTGGGTCCCTCTCGACGCAAGAAATCTCACGACATACAAATTCATTTACGCTTAC  
CAGCTGGTGTGCCTTACCGAAACTGCCGTGATGATATTGGGCCTGGACACAATATTTTTC  
GGTCTCTTAGCTCATGCTACTGCCCAATACAGAATACTGAACACGGCGATAAGAACAGTT  
AAGGAACGGTCTGTACACCTTGTAACCTCAACGCTCAAAAGGCCTGGCTTCAGAAGATTCT  
GGTAACACCATCGATAGAACTGTCTGAAGAGGAAATGAAACGACAATTGAGGAAGTGCGCT  
GTTCAACCATCAAATTATATTAGGATTCTGCGACCGCATAGAGCAAACGTTTCAAGGCGTG  
ATGCTCGGTCAATTCGCCGCCCACTGATTATTATTTGCGTGACCTTGTAACAGTGCGCG

ACAAGATCCGGTATGAATCTTGACTTCGTGTATATGATTCAGTACCTGTAAACAATTACA  
TTGGAACCTCTTCTTCTACTGCTGGTTTGGAAACGAGCTAACTATAGAGAGTCAACGCCTA  
TCGCAAGCGGTGTTTCGACAGCGAGTGGATGGGGGCACCACGGGAATACACCTCTATTTTG  
AGGATCATTACGCGAAGAGTTTGAAGCAGACCACACTTACAGCA

#### EsigOR4

ATGGCCGTAGTATATCCGAGCAGCAGTTTGGATTACTTTTTAGGATTTTGACCTTTTGT  
GGGGTTTGGATGCCGCAGTCTTACGTGGGAACGTGGAGAGGGTCCTTATACAAATTCTAT  
TCATGTTTTATAATGATGGGAACGATTTTGTCTAACCCGTTTACTCAAATTATGGACCTA  
TACATGAATTTCCGGCGATTTAGACAAAAATGTGGAGACATGTAAGTGTGCCTCATGCGTT  
ATAGCAGCGTCAGTTAAGACAATCAACATAATTATAAGGCGGAAGCAGATTCAACAAATC  
TTGACAATGTTGGACAGTGACATTTTACCCACGTTAGCGCGGAAAATAACATTTTAATG  
AATAAGTACATGAGAGCTGTCGAAATCGTCTCAAAGTTGTGCTTATACTTTGGATTGTGCG  
AGCATTATCCTGTGGGGGGCTCTGCCACTATTCAACAAGTTGGAGGACAGAACTTACCC  
TTGAGGGCGTGGTTTCCTTGGGACACATCTGAATTGTCTACTTACATTATGCTGTATACA  
TTTCAAGTGTTACAGCGTCGCCATCTTGGCGTCTTTCAATGCTAGTCAAGACGTGTTGATG  
GGTTCAGTTGTTATTTTGCTTTGCGGTGAACTGGATATGCTATGTGCTGAACTTTCGTCT  
TTAGGTCAAGGTCTCGGGTCGCAGAAGAAACGTATGAAATCATCCCCTATTACCGGATC  
GGAATTATCGCTGAAAGAAGAAGGCGTCGAGATGTAAACATGCGACTAAGTCGTTGTATT  
TTTCATCATCAAGAGATCTTGAAATGCGTCAAAACAAGTTGAGAGCGTGTTCAACGGAGCC  
ATTTTCATGCAATTTTTACTAAGTTGTATGACAGTCTGCATCGTAGCTTTCCAAGTGAAGT  
GTGACCAAATTCTCCGTGCAGTTCTTGTGCGCAGATCATCTACATATGTACGCTTATGATG  
GAACTTGTAAGTATTCTGTTATCCTGGTAATGAGATGATGGCAAAGAGTCAATTGATATCG  
TCTGCTATTTACCAAAGCCCTTGGTACGACCAGGACATGGAGTTTAAGAAGATGATGTTCT  
ATTCTTATGGAGAGATCTAAACGTCCCCTCATACTACCGCTGGACACATTCTGCCCCCTA  
ACGTTGGAAACATTAATTTTCGATTCTCCAGTCGTCTTATTCTTATTATCTTGTGCTGCAA  
TACTTGTATTTCGGAAGGTAA

#### EsigOR6

TTTTTTGACTACATGCTGGGCCGGAAAGTTAAGATGCTCTTCCCCTACATACTCTGGTAT  
CCCTTCGATCCTCGTACATACATCAGATACCCCTTCGTCTACTTGGTGCATGCGGGTGCT  
GGTTTCAGAGCTGCTTGCGGAATTGTGGGGCCAGATTGCATACTGGTTACATTGACAAGT  
CATATGTGCATGTTATTCGCCATACTACACAACGACTTGGAGAATTTGATGGTGGAATGT  
GACGAAGCAACATTTGACAAAACGCTTGTTCAATACAATCAAAGCAGTGTGGCTCAGCTC  
AATGAACATGTCAATTCTTCTCTTATGAACGCCTTGGTGCTTTTGTTAAGAAAACATCAG  
ATTTTGATAAGTGCTGCTGAAGATATCGAGCAAGTATTCAACCTGAGCATTCTCATTAAT  
TTTCTTGCAAGTTCTGTCTAATATGCCCTCGTTGGATTGGAAGCAACCGCCAAAGACATG  
AAGGAGCTGGTGAAGTTCATTATGTTTCTGCTTTCGTCACTCGTCCAGCTTTTCATGATC  
TGTTGGTTTGCTGACAACTTATGGAACTAGTGCAGGTTTGTGCGCAGGCCGTCTACAAC  
AGCCGGTGGTATGACATGCCGATGATCATTAAGGCGTTATTTTTCATAATGGTCAGG  
TCTAAGAAACCATCATACATCACTGCCTTCAAGTTCTCCTCAGTGTGATTGAACAGCTTC  
ACAAGGATTCTTAGCTCATCCTGGTCATACTTCACTCTCCTGAGGACTATGTACGACCCA  
TCCCACTCAACCTTGAAACACTAA

#### EsigOR7

TTTTTTGACTACATGCTGGGCCGGAAGTTAAGATGCTCTTCCCCTACATACTCTGGTAT  
CCCTTCGATCCTCGTACATACATCAGATACCCCTTCGTCTACTTGGTGCATGCGGGTGT  
GGTTTCAGAGCTGCTTGC GGAATTGTGGGGCCAGATTGCATACTGGTTACATTGACAAGT  
CATATGTGCATGTTATTCGCCATACTACACAACGACTTGGAGAATTTGATGGTGGAATGT  
GACGAAGCAACATTTGACAAAACGCTTGTTCAATACAATCAAAGCAGTGTGGCTCAGCTC  
AATGAACATGTCAATTCTTCTCTTTATGAACGCCTTGGTGCTTTTGTTAAGAAACATCAG  
ATTTTGATAAGTGCTGCTGAAGATATCGAGCAAGTATTCAACCTGAGCATTCTCATTAAAT  
TTTCTTGCAAGTTCTGTCATAATATGCCTCGTTGGATTCTGAAGCAACCGCCAAAGACATG  
AAGGAGCTGGTGAAGTTCATTATGTTTCTGCTTTCGTCACTCGTCCAGCTTTTCATGATC  
TGTTGGTTTGCTGACAACTTATGGAACTAGTGCAGGTTTGTGCGAGGCCGTCTACAAC  
AGCCGGTGGTATGACATGCCGATGATCATTAAAAAGGCGTTATTTTTCATAATGGTCAGG  
TCTAAGAAACCATCATACATCACTGCCTTCAAGTTCTCCTCAGTGTCAATTGAACAGCTTC  
ACAAGGATTCTTAGCTCATCCTGGTCATACTTCACTCTCCTGAGGACTATGTACGACCCA  
TCCCACTCAACCTTGAAACACTAA

#### EsigOR8

ATGCTGATTTTGAGGAACTACGTTCTAATAACTGGGGCGTGTACTCTGGCGTATCTGGGG  
CCAACTGCATTTCGTTGAAAGCGTTGAAGTCGAGGAAGGTGAGACGGATTATTGGGGAATA  
GTAAATCTGTACGCGCCTTATGATTATATTTTTTTTCGAAAGATATGGCATTGCCAGAATA  
GCGATAACGATGTTACTCTACTACCATTTCGATTGCCAGATATTTCTGGATATGTTCTCA  
GCATCCCTGTTTGTGCATCTCGGTAGGCAGTTCGAGGCTGTGGCTGACATGTTCTTTAAT  
GTACAGTATTCAGATAACGGCGAGGAGTACATGGTTCCTTTGAGGGAAGCTATTGAATAT  
CACCAGCTCCTGTAAAGATACTCGACTGACTTGCAGCGCATGTACAATGCAGCGTTTCTG  
GCGCAACTCCTGGGATGCTGCCTGCCGCTTTGCTTCTGCATGCTGCTGGTAGTGAACAAC  
ATGAAGTCAGAAGAAGGGAATTTGATGAATGCCATCACTCATTTAACGTTTCTGATCGTA  
GTGGTGTATCAGCTGTTTATGTACACGAGGTCGGCGGACGTGATAAAGGAAAGGGCTCTT  
TTAGTATCGCAGGCAGTATACCTGAGCGATTGGCACCTGGCTCCTCCTTCCACGAGGCGA  
GATCTGATCTGGGTCGTGGCGCGAGCTCAGCGTCCCATTTGAATACTCGGCGCTGGGAATA  
TTTCCCATGACTATTTCAACGTTCACTCAGATAATGCAGAGTACTTATGGCGCCTTCTCC  
TTGCTGACCAACGTAGACTGA

#### EsigOR9

CAAGGCGTCCAGGACACACTGCTATCCATCGACATGCTGACAGCCGATCGTCCCACGCAG  
AAAGAGGTGGATCATTTTCATCCAGGCAATCGAGATGAACCCCGCCATCGTGAGCCTGAAA  
GGCTACGCCCACGTCAACAGGGAGCTCTTGACATCGGCCATGAGTACGATAGCCATCTAC  
CTGATCGTGCTATTACAGTTCAAGATCTCCTTGCCGAAGGAAGCC

#### EsigOR10

TTCTGGACAACCGTATTTCGTCTACATTGGCAGTAGCTTCATTCTGTGCTCTTACAGCTTG  
TACTCCACACAGCATCCAGGGATTTATCAGAAATGACTCGGCAGGTTGCTTTGGTCATA  
CCTTTGACTGTTATGTTGGGAAAGATGTGGTTGTCAGTGACAAAGAAGGCCGAATTCCAG  
TCAATTATAGAAGAAATAAATGACGATTACATTGAATTCGTTTCATGCACCTAAGAAATAC  
AAACGAATCTACAGAACCGTCCTCGATGAATCACTAAAAGCCCAGACCGCCTGGATACTC

ATATCCAGCATCGTGGCCCTAACCTTTCCAGCGGTAGCGGCCTACAAGATGCTCAACCAC  
AATCTGCACCACAACGATCACCAGAAATATATGCTGTACGAGCTGTCGATACCGTTTCCTT  
GAACCGTTCAAGTACAACACGCCATTTTTTCGAAATCATCTTCGCTTACTCCTTTCTGATC  
GTCTGCTTTTGCATAACCAATTTTCACGGGTTTCGACACCACGTACCTGATTGCGGGCTCAA  
CACGGAAGAGGTCAGTTGAAGGTCATGACGACGAGGCTCGCTGATCTGTTTAAGATGAGT  
TTGGACTCCGACGCCCCGCTACACGCGCTTAGGGATTATCGTACAGCATCATCAGAAGATA  
TATAGGTACGCCAAGAGGGTCCAGCGTTTCTACTCCGCCTGGTTCACCACTATAGTTTGC  
CTCTCCTCGGTTTCAGATTTGCTTGACGCTCTACCAAATGACTGAGGCTCTCGCCAAGCAC  
AAGGTCAAGATGGAATTCATTATCTTCACAATCGGTACGGTAATGCAAATCTACATGCCC  
TGCAGGTACAGTGCTATCTTAAGTGATGCGTCATCTGAAGCGGCTGTTGACATTTATCGA  
TGTGGATGGGAAAAATAATTTGAATAAAAAAATATGTTTTGCTCTCAAATTCATGATTGCG  
AGAGCTCAAATGCCCATTAAGTTTAATGCTTCGTTCAATTTGTCCTATGGATATGAATGGT  
TTCACATCAATCATTAATACCTCATATTCATACTTTACTCTCTTGCGAACGAAGAAATAG

#### EsigOR11

GTCGAGGCCACTTATCACATAAATTATTTGGTCCAGATATCAACCAGCGTTGGAGTCATC  
AGCATCACCTTGCTGCTTCTCGATATTGTAGACACACAGTCCGTGCAGTTCTTTTCGATG  
GGATCGTACATGTTCCGCATGCTTATTCAGGTGTACGCTGTACGTTGGTGTGGGAATCAA  
GTTACGGACAAGAGTTCCGAACATAAAATACGCCTTCTACGACAGTCCGTGGTATGTAATG  
AGCAAGAAATACAAGCAACTCACAATGATCGTGCTGCAGAAGCTGCAGACGCCCATAACT  
CTGAGAGCCGGCAATTATGTTCCACTTAGCCTCATAACATTGGTTTTCTATACTCCGGACT  
TCTTACTCCTACTATGCAGTACTGCAGCAAAGCAAGCATAAGAAAACTGGTCTGTGA

#### EsigOR12

GTTTATCAGCTCTACCAGCTCTACCTGATAACTTCGTGTGCAGATGAGGCGCGCCATGAT  
GCGTTGCTCGTGCGGAAGGCGCATACTTCGGTGACTGGACGAGCGGCTCTGTGGCAGCT  
CGGAAGGCGCTGCTGAACGTCATACCCGAGCGAACAAGACCATCTCTTTTTCTGCCCTT  
GGCTTTTACGATATGAACATGGAGACTTTTCTTGCTATAATTAAGCTGCTTATGGAGTG  
TTTGCA

#### EsigOR13

ATGATGACCAAATTCAAAGTGCAGGGCCTGGTGGCCGACCTGATGCCCAACGTGACGCTC  
ATGAAGGGAGCGGGGCATTTTCTTTTCAACTATTACGCCGAGAATGGGGCGTTGTCCGTA  
CTCCTGCGCAAGGCATACAGCGTGATGCATCTGGTGCTGGTGGTGACCAACTTCCTCTGC  
ATTGCAGCCAACATGGCCATGCACTCGGACGACGTCAACGAGCTCACTGCAAACACTATC  
ACACTGCTCTTCTTTACTCACTCCATCACTAAGTTCATATATTTGCGGCTCAATTCCAAA  
TCCTTTTACAAAACATGGGGAATTTGGAACCAGGCAAACACGCATCCCCTTTTCGCCGAG  
TCGGATGCTCGCTACCACCAGGCAGCCCTACCAAGATGCGAAGGCTGCTTTACCTCGTG  
AGCGCAGTCACTATATTGTCAGTTATAGCGTGGACAACAATAACATTCTTTGGTGAGTCT  
GTGCGGTTTTCGCTGGACCGTGAGACAAATGAGACAATTACAGAACCCGTCCCACGACTC  
ATGGTCAAAGCCTGGTACCCCTTTGACGCCATGCACGGCCCAATGTACATCATTGCGTTT  
GTCTACCAGTTATACTGGCTGACCTTCACGCTAGCCCAAGCCAATTTGCTGGATGTACTC  
TTCTGCTCGTGGCTCATCTTTGCCTGCGAACAGCTCCAGCACCTGAAGGCCATAATGAAA  
CCTCTAATGGAGCTGAGTGCCAGCCTCGACACATACAGGCCGGGCACTGCTGAGCTGTTT

CGCGCTCATTCTGCCTCCTCGCAATCAGCTTTAATTAATGAAAAGGACGAAAAGAGCCCC  
GAGGGTGGAGATTTTCGATATCCGTGGCATCTACGCAACACGTCAGGACTTCGGAATGGCG  
GCGCGCGGAGAGCCCACGGCCAATAACCCCAACGGGTTGACGCGCAAGCAGGAACTGTTG  
GTTTCGCTCAGCCATCAAGTACTGGGTCGAGCGGCATAAGCATGTTGTTAGGCTGGTTGCA  
TCTATCGGTGATACATACGGCACAGCTCTACTATTCCACATGCTTACCTCTACCATCACA  
CTTACGCTTCTTGCCTATCAAGCTACTAAGATATCTGGCATTGATGTCTATTCTCTGACT  
GTCATCGGCTACTTGGTCTATACGCTGGCTCAGGTGTTCCACTTTTGTATATTTGGAAAC  
ACACTCATTGAAGAGAGCTCATCTGTTATGGAGGCAGCCTACTCGTGCCACTGGTACGAT  
GGATCAGAGGAGGCTAAAACCTTCGTTTCAGATTGTATGCCAGCAGTGCCAAAAGGCCATG  
TCCATCTCCGGAGCCAAGTTCTTCACTGTCTCACTCGACCTGTTTGCTTCTGTCTTGGT  
GCCGTCGTCACATACTTTATGGTGTTGATTCAACTCAAGTAG

#### EsigOR14

ATGTGTCTGTTTCTGTATTACGTTTTTATTAGACGCCGCGACTTGCTTAAACACATTTAC  
GACACTCTGTTTAATAAGCTGTACATCCATATTCAGGTAGGGGGCAAGGAAAAGGTGTCC  
CTATATAAAAAGGCAAGCCAACGTGGGCATTTTTTTCATCAATTTTTTCTTCATTCAAATA  
TTATTCAGTCAACGCTTGTTTTTGTAAAGGCCAATCATCGCAAGTGGAATCAGTTTTTT  
CTCGATCCCAAAATTTCTTCTATTCTGCTTTGCCACCTGTATCGTCTCCAGTCAGGGAA  
ATTACTATTTGTATGCAGGTTATCAGCCTTTTTTGTTCATCGCTAGCTTAAACATATATTGGA  
TATATTTTATTCTTCATCTTGCTAATGCATGTTTATGCGCATATCTATATTTGGGAGAA  
GATATACAGAAAATTAAAAACCTAAAAAACAAGAAGACATTGCGAGTGCTATAAAAGTA  
TTTGTTGAAAGACATCAAGATATAATAACGTGTGTTGCTGATATGACCAAGCTCTACGAA  
CCCAAGAATTATATATTACCGTCCTTTATTATGCTCATCGTTCCTTTGTCCCGCAATAGGG  
TTTGATGGGACGACTGACACGATATCTTCTGCTGTCTGCTGGTATACTCACATGCCCTCCTA  
CTGTTCAACTACTGTTATGGTGCTGATATCGTCTGTCCTCAAGAAAATACGGAGCTGCTGAAT  
AAAGTAGCTTGGTGCGGTTGGGAAAAGTTTGACCGAAGCAATCAGAAGGCTATTCTTATT  
GTGATGTATAGGCTCAATAGACCGCTGAAGCTCCGAGCCGGCATTGCTGGAAGCTTTTCT  
TTGGAATGTTTGGACAACTATGAAAGCCTGCTATTCTGCTTATGCAACTTTAAATACG  
GTCAAATAG

#### EsigOR15

ATGAAGTGTGCCGAAGGCTTGCAGACCATAATGAACTATGTGTTCCCTCATACAACTTATT  
GGCAGCTGTGTACCATTTGTGCTTTATCATGTTTTTATGCTATCCAGGCGCCCGTAATGGAT  
GATGAGAAAATGGTGGATGCAATTGGTCACTTCTCTTTCTGTTCTTGTGCTTATCAG  
CTATTCTCATGGTGAGGTGCGCCGATGTTATAGTCGAACGGGCCTCTTCAGTTGCCGAG  
GGTGTCTACATGAGCAACTGGTACCTAGCGCACCCCAACATGAGGCGACAGCTGACCAAC  
GTCATACATCAAGCTAATAAACCTATCAGATTCTCAGCACTGGGCGTGTTTCTGTGACT  
ATGGATACTGGTATTAAGATTGTGAAGAGCGCATATGCAGCCCTGACTTTGATCAGAAGA  
CTCGATTAA

#### EsigOR16

ATGCTCAACGGAGTTTCCTCGATTATATTCGGTATCAGGTGTTTGATTCATATCCTTGAT  
CTACTTTTCAACAAGAATAATTTTAAATACGTTTGCAAGCTATTTCGCTGATGATATATGG  
GTGAGGCAGAATGCAGAGGAACGATCGAAATGCGAGAAGAAATTGAAATTAGCACGTTTG



GTTTGTACGGTACCATAGCTTCCGATTTTGCCTACATGATTGAACCGACAGTTCAAGTA  
TTGTCTTCAACTATTGATTATGCATCCAAGGGATATACATTAAGTGTACATTATCCGATC  
GATACGCATCAACCAGTCGTCCACGAAATAACTTACGTACTAATCAACATTGCTGGATTT  
GTCAGGGCGTCACTGATTGCTAACATCAATTTGATGATGAATTATTTTATAGTCTACACT  
TCATACAGGTTTGAAGAAATTTCAAAGATACTGATTGTGAAAGATTTAGAAGTTAGTACT  
GACAACAACTGCAACACAAAGAAAAAATTCGCAAAAGCAGTTGAAACGCAACAATTATTG  
ATAAGTGCCACAAATAAGCTGCAAGAAATGTTCTCCTTAAGTATCTTTGCACAGTTCCTG  
TCGGATTCTCTCTTGTGTTTTGTGTTTTAGGAGCGTTCGTATTATTGTCGGAGACATCGATG  
GTGGTTTTATTTCAAAGTCTTGCTTTTCTTACTATCAGTGCTCGCGCAGGAATATGTCAAC  
TGTGTGGCCGGGGAGTCGCTGACACGATCGAGCGCCGAGGTAGGTGATGTTGTCTACATG  
AGCAACTGGCAGGACCACGATCCGACGAACCCGTCATCGGACTGATCATTCAACGGTCC  
CAGCGAGTATTGAACTGACCGGACTCGGTTTCTTCGATCTTTCTCTGACTACATTTACG  
AAGGTATGCAACAGATCTTTGTCTGCTACCTGACAATTCACGCACATTCTTCGAGTAG

#### EsigOR17

ATGAAATACTTTGCGTTGGGAGACTTTACGCCGTCAAAAGATATAACGGTTCCCGCCACC  
AATAGATATTTGACTTACATTTACATTCTTATCTGCTGCTTGGTTGTTGCCAGCTTGACG  
GGGGGAGCCGTGCGCATCGATACATTCAGCGAATTTGTTTTGGGCACCTCCGAACTCTGC  
AACCAGGTTCTTGCTGTCGTCAAGTACATTGCCCTCGTTCTCAACCGGAAGAAGGTGTAC  
AACATTATTAAGCTGATTGCAATCGACAGGTTAGATTACAGCACTGATGAGACTTTTCTA  
GATCGAGCCGCGGCAAAATCCCGTAAGGCATTTTGGGCATACATGGTCATGTGTCTTATT  
TGGCTGCTGGGTTACATTGCTGTATCTTTTGTGTTGGCCAACACAAATCTGTCGTGCGCGAA  
ACTGAATGGTACTTTTATGCCCATGTACGTGCCATACGATATATTTATTAAAGAAAGATAC  
GGTTGTGGCACAATTTTTTTGACAGTGGGATTGATTTACAACGGTTATTGTCATGTTCTT  
ATGGATCTTTTCACAGCAACTGTTTTTATGTACACTTCTGCCCAGTTTAAAACTATTGCG  
TTGATGTTTCGAGAACGTTAAATTCATAAACACAGCTAATGGAAAGTTTGCCTTGAAGAAG  
AATAAACATAATAACAACGGCCACAATAAGAACGTGGTGTCAACAATGCCTGCCGATTTT  
AGAAATGCTATACAGTACCATCAAATAGTACTGAAAAGCGCTAATGATCTGCGTAATGTT  
TACAGCGCCGTATTCTTCTTCCAGATCTTGTCGAGCTGCATACCGCTTTGCTTCAGCATG  
TACCTCATAACACATGCGTTAAATTATACTCGTGACAACCTTATTCTATTTGCTGATTCT  
GTGAATTTACTCCTGTATTACATGTTCCAACTTCATCTTATCTTGTCGAACGCTGATGAA  
ATTAAAGAGGCAGCCTTACGTGTGGCTGATGGAGCATATTTGAGTAACTGGTACGAAGGA  
TCATTGCCCACTCGTAGTGCGATGATCAACATCCTCTTGCAATCTAATGAACCCATTGCC  
TATTCGGCACTAGGAATATTTGATATCAATATGCAGACATTATAACGATAGTTCGATCT  
GCATATGGGGCTTTAGCACTTATGACAAATTTTACATAA

#### EsigOR18

GACGGAAGCAGCGAAACGATGTCTCGGGAAAGTTACCTTAAGATTCACATAGTGCTGTTG  
AGACACTACGGCTTTGGCGACTTCACGCCGGCCAAGGGCGCCGACGTACCGAAGTTTCGAC  
AAGGGCTGGACCGCATTCACGTCTTGCAAAAGATCATTGTCTCATCGCTATGTTCCGG  
GGCGCGCTGTATGCTGAGACATTGAGGGGCTTCTCCCTTTGCTGTATCGGATTTCTTAAT  
TTGCTGCTCGGCTGCATCAAGTTCGTAGTCCTGTTTCGTGCACAGGAATAAAGTTTACAAA  
CTCGTGAAATTAATCGAGATAGACCGACTGGACTATTTTCGACGATGACAGGTTTCATGGGG  
CCTGGAAAACGTGGAACCTCGCAGGGTCCTTATGGGCTACATGATTATAGCTGTCTTCTGG

TTAATAGGAAATTATGTGAGCTCCTTTAAGAATGACGTGGACAGCAAGTGGACCTTGATG  
TACCTGCACATACCCTACGACTTCTATGTGAAAGGCAGGTATGGCATCATAGAGTTCCTT  
GTTACGACGCTCATTATGTACCAAGCCTACAGTTTGTATCTTCACGGACATCTTCTCTGCC  
TCCATCTTCATATACATCTCTCAGCAATTCAAGACGGTGGCTTACATGTTTCGAGACGGTG  
CGGTACAACGATCCGAGCGAGAGGGACTTGCTGCGCAGAGATACGGAGAACGGGATCGCT  
CTGCGCGACGGAAAGGGGCGACCCAAGATGCCAAGCGACCTGAGGACGGCCATTTTATTT  
CACAAAATACTGTTAGAGTGTGCCGAGGATCTGCAAACCGTGTGGAAATTAATATTTTTTC  
TTCCAAGTGTTGGAGAGTTGCTTGCCGTTGTGTTTGTGTATGTACCTCGTTCTGCATACG  
GTCAACTTCACTTACGACGAGATATTAGCAACCTTCAGCCACTTCAACTTCTTGATTTAT  
CTCCTCTACCAGCTCTACGTGTTGACTGCATGTGCGGATGAGACGCGCCATCAAGCGTTG  
CTCGTAGCGGAAGGCGCATACTTCGGTGACTGGACGAGCGGTTCTGTAGCAGCCCGGAAG  
GCGCTGCTGAACGTCATTCATCGAGCGAACAAGCCCCTATTATTTTCTGCACTTGGCTTT  
TACGATATGAATATGGAGACTTTTATTGCGATAATAAAAGGTGCCTATGGAGCATTTGCA  
TTGATGAAAAGTGTCATTTAA

#### EsigOR19

TCGATGCTGGTGGAGAGCTTCTGCTACTTCATCGTGACGACAGTGGTCATTATCTTGGTG  
CCCAGCACGCAACGCGGTAAGGAGAACTGTATTGGATCATGAAGGTACTCGAGAGAGAT  
TTCAAGTTCGCCTGTTTCGCGCGTGGGAAGCCAATACAGAGAGTTGTTCTACAAGAAGCAG  
CTACTGATATGGCGCATGGCCATTCTGTGGTTCTCTTCACCTCGCTCATAAACACCTCC  
TTCTGCCTAAAGGGTATGCTGGACATCCTCTGCCACGAGCTGCTATCCGACTACGACGAA  
TCCTACCAGAGGCCCTCATATTCTCCCTCTACCTACCCTACGACGACCTTACAGGACA  
CCCAAC

#### EsigOR20

GCCGCCATTCTTACTTTGGATACATTGGAACGCCTTTATATCAAATCACATGGGCTTTA  
CAGGCTTTCACCATGACGGTTACGGACGTGCACACGTACTTTCTCGACGCTCTGTTCCCTC  
GTCACCTCTGATGCACATCTACGCCACATGCACATGCTGGGCGAGGACATTCAGAGCATG  
AAGAATATGACCAGACGGGAGGATGTGACGCGCATGATCCGACAGTTCGTGGAGCGATAT  
GACGACCTGCAAATCTGCTTAAACAAGATCACGGCCATATACAGCCCGAAGAACTACCTT  
CTTCCGTCGTACATCACTGTCATTATCCTGGCGTGCGCCATCGCCGCCAATGGTTCAAGG  
GAGACGACTATGTTTCGTCATAATGGGCTACGCGCATGCGCTTATTCTATTCAATTACTGT  
TACGCTGCTGAAGTCGTCGTGGCTGAGAGCGCTGATCTTCTCCACAAGGTGGCGTGGTGT  
GGATGGGAGCAGTTCGACCAACCCAACAAGAATAACGTGCTGATACTCCTCAACCGACTC  
CAGAAGCCCGTCATGCTGAGGGCCGGCTTCTCTGGCGGCTTCACCTTGGAGGTCTTCGGG  
AATACTATGAAGACCTGCTATTTCAGTGTACGCAACTTTGAATTCCGTCAAATAA

#### EsigOR21

ACAAAATCTGGAAGAAAATTTGACAATGATGCGTCGACGCCCTCTCCAAATATTGAACAT  
TTAGATGAAAAGTTAAGACACATCATTATAAAACATTTGGAGATCTTGAAGTTGGTCGAC  
AAAATGCGAAATACTTACGATATTGCCATGGGATTAGACTTTGCTTTAATATCAGTCGCC  
GTCTGCACCCTTTTGATCAAGATGGATCAATCGGAAATGTTGTTTTTATCCAATACAG  
TCTTACGTATTTGGCGAGGTCATGATGTACTGCTATTGCGGTCAACACTTGATCGATGCA  
AGTAACCAGTTGGAAAAAGCGGCTACGCCTGCGGCTGGGAGGAATGG

#### EsigOR22

ATGAAAGATAATGAAACAGCATCAAAGTACAAATATTATTCTCACTTTCTGTATTTATGC  
AAAGTTTCGTCTTTGCTTCTGAGCTTCTTCAACGTAGCATACAATATCAAATTAGAAAT  
ATGAACGAGCTGATACGGCAATTTTCTATGTTGGTGCTCATCATAGCAGCGCTGTTCAGG  
ATTATAATGAGTTCAAAGTTCAGTAAGGAATTACGCGACTTGAAATTGTGCGATGAATGCC  
GATTACGAAGAGTGGGGGCATTTTGACGATACCCAGTGCGTAATTATGAATGAGCTTATA  
AGAGGTAATAAGCGAATTGCTTTAAAGGTAACCCGTGATCGGCACGAACGCGGTGATGTCA  
TTTATCGTCAGTTGGGCAGGCAAGATGCTGTATGGCGCTATTACAAGCAATTACAAAAGA  
CTATTAATATTCGACTTCAAAATCCCGATGTTAGATGAATATCATAAATATCAGCCACCT  
CTTTACCAAAGTATCAGATGTACACTTGCCTGATAATGTTCTGAACATGCTGACTCTG  
ATCGACTTTGACAGCACGATGCTGATAACCGTAAATCACTATTGCTACTCGGTGGACGTT  
TTGAACCATAGACTAGTTAATTTGTTCCGGGGTCAGGATCCTCGGTGCTACGATCCTCTC  
TTGACTGGACGAAGGCTCGTGAATATAGCGCAGCTTCATCGTCACGTTGTAAGCCAATTT  
CAAGTGATACAAAACATTTACTATCCGTATTTGTACCTGATTTTCACACTGTCATCCGCC  
GAAATTTGCGTACTCATGTTCCAATTCACCGAGGAACTGTTTGCCGGTCGCTTCCAGTAC  
GAATTTCTTGCGCTGTAACTTGTTCAAACTCTTAGTGACACACCATGTCGTGGTATGGA  
GACAAAGTTATGAAACAGTGCGAGTCGGTGGGCTCTGCTGCGTATCACAGCGGTGGGAG  
GGTTGGCCGGACATGGCTGCGCGGCGTGACCTGCTCCTTATTATGATGCGTACCGCCAGA  
CCTACCCTCTCAGGACCATTTTCAGCGACATCAATCTCGCCGCTTTTAGCGCTACTGTC  
AACTCCGCATGGTCCTACTTCACACTTCTACGAACCAGCAGCGAATAA

#### EsigIR25a-2

ACCGGTATGGGCTCGGAGACCGTCAAGTCTTTACGGCCGCCCTGGCGCTGCCGACCATC  
TCTGGCTCGTTTCGGGCAGACAGGCGACCTGCGGCAGTGGCGAGCGCTCGACGCCAATCAG  
ACAAAGTTCTGCTGCAGGTGATGCCGCCGGCGGATATGCTACCGGAATGCATAAGGTCC  
ATCATCACCAAGCAGGATATCACGAATGCTGCCATTATATTCGATGACAATTTTCGTACTA  
GATCACAAATACAAGTCGCTCCTCCAAAACATTCCGACACGGCACGTGATAACACCCCTC  
AAAGGCAGCAATCTCGAGGATGTGAAGAATCAGCTGCGCAGCCTGAGGGAGCTGGACATC  
GTCAACTTCTTCATACTCGGCGACCTGAAGACGATCCAGCGCGTGCTCGACGCCGCCAAC  
GAGAACCAATACTTTGGGCGGAAAACCTCTTGGTACGCGCTGAGTTTGGAGAAGGGCGAT  
GTGACC

#### EsigIR13

CGTAAAGATTACCAATTCGTTTCTAATTTGTTTCCACAAAAATTGAACAATTTTAATAGT  
TGTCCATTTATTATATCAGCTCGTGTTACACCATCATTTTTTACTGTGAGAACTGACAGT  
CATGGAAAACAAGTAGTTGGTGGAATAGAAGGTGACTTTTATAACGTTCTGTGTAGGATG  
ATAAATGCAACGTTAATAATATTGGATGCAAGTAGACCTGCTTCATCCAATGAAATAAAT  
GGA

#### EsigIR18

ATGAAAAACGATTCAATGTTCACTAACTACGGTAAATTTATAATCATTTGCGATGAAGGT  
GATCAAACTGCGGAACGCTGTAGCGAGGAAATCTTATTTGATACTTGTGGAGGCACTAC  
ATAGTAAACGTCGTACTTTTACATCACTCTGAAGCAGACGAAGTGATTGTATCTACATAT

TTTCCCATGGAAGATGGAATCTGTAACACAGTAAAGCCGAAAAACATTAGACAGCGTAAAA  
CTACGTAAAGATTACCAATTCGTTTATAATTTGTTTCCACAAAAATTGAACAATTTTAAT  
AGTTATCCATTATTATATCAGCTCGTGTTACACCATCATTTTGAAGTGTGAGAACTGAC  
AGTCATGGAACAATTAAGTGTGAGAATAGAAGGTGACTTTTATAACGTCCTGTGTAGG  
ATGATAAATGCAACGTTAATAATATTGGATGCAAACAGACTTGCTTCATCCAATGAAATA  
AATGGAGTGAGACTGATGGATGACCTCATGCTACGTCGAGCCAATATGTCCTTTGCCAAA  
GTTATTCACGTTGAAATTGCGAATATTTCCGTTTCACATATCCTGTCTGGGTACGAAG  
GTCGGCTGGGTCTCTCCACTTATTCCCCTTCGGCCTGCGTGGGAGAAATTAATCACGCCG  
TTCGACTTGCAGCTTAGACTTTTCATTTCGCAATCGTTATCTTGGCATTGTTTCTCGTATTG  
GTGGTCTTGAAAGAAACGAGGTTAAACGTAATGGAATGGGTTCTTTAAAAACAGACGTA  
TTGAATTCCAACCTCTATATCAATACTTGTGCCACATTCCTTGGTCAAATAACCGCTAAA  
CTGCCAAGGAAAACTGCAGTTGCGTGTTGTTTAACTTGTGGATATGGTTCAGTTTCTTC  
ATGCTGAATGCTTACCAGGGAGCTCTCATCAGTGTTCTCAAACGTGACTCATACCAATTG  
GATCTGGACACTGTTTCTGGTGCCATTAAGGCCGGGTATGAATTTAGATGAATATCTGAG  
TTAAGGAATTATTTTTTTGAAGAACCTAAGTTGTATGAACAGTACACTGTTATGGATATT  
CGTAATATCATAAAATCTTTGGAGTTAATGTCTAGAGAATCTTTAAAACTAATCATACAT  
ATACCTTTAGATTTAATAGGCTACTTAAATTTTAGCAAACATCACATTCGATACTTGCAT  
GTTATTTCAAATGAAAAAAGCAGCAGCACGTTACGTATTATTTACAGCCAGACTCGGCG  
CTGGAGAACACATTAAACACCGTCGTTCTTCGTATTGGAGCCAGTGGAATTTTTGTCAA  
GTCACCGCTGGAGCACGTTATTTGTATAATATAAATAGTTACAAGATTATTGGAATACA  
GAGCGAGATAATGCATTGACTATGCACCATCTGGAAGCGTGCTTCTTGCTTATTATTTGT  
GGATGGATTTTGTCTTCGTTACTTCTATTCGTAGAAGTAATTTATAAACGACATGAACAA  
TATCGAAATCAAAGCGCCGTTCAATTGAGAAGATGGATGATATAA

#### EsigIR75p-8

ATGCAAAAAGAAGGGTGTTATAAGTTTAACTGTGTATCTGTGTACTTGTCTGTGGCATC  
TTAGCTCCCAAACGGATGGACCGATTTTAATTTAGTTTTTTTTGGTTGAAAGGTGACTTG  
ATCGAGAGTGTTCTTAGCTATGATTCAAGAAAATCTGTTTAGCCTTTAAAGATCATCAGC  
TCTTTTCTGGTTGATGAAAGAATGTGA

#### EsigIR19

GGTGATTTGTACTTGCCTCTGTCCAAAATGATCAATGCGACATTGCAAGTGAGGGTGGA  
ACTGTTCCATGCTTGTTTAAATGGAACACACTGGACTGGAATACTTGAAAATCTCGTAATG  
GGACAAGCCAATTTTACAATTGCTAAAATTTAGATATAGACGTAATAAACACTTTCCGC  
ATAGTGTAACCCTTACTGGATTAAGGAGATAGGGTGGGTCTCCCTCCTGTTCTCTCAGG  
CCCGCGTGGGAGAAATTAATAAAGCCATTCGACTTCATACTCAGAGTTTCATTTGCAATC  
GTCGCATTGCTCTTGGCTCTTGTTATTAGTGATTTTGAAGAAACAAGATTAGAAGGTAA  
TGGAATACATACTTTACAATGGACGCCTTACATGGCAACCTCTATATAAAGACCTGTGCG  
ATATTCTTTGGACAAGTAGCTGCTAAGCGACCAATGAATGTTTCACTGTCATGTTGTTTA  
GCTCTGTGGATGTGGTTCAGTTTCTTCATGCTCAATGCTTACCAAGGAGCGCTCATAAGT  
ATTCTGAAACGAGATGTGTACCAATCTGATTTGAACACTGTTTTGGGCGCTATTGAGGCT  
GGGTATGAATTTGGAGGACCGACTGTCTTGAGATCATATTTTACTGAGAAACCTAACCTT  
TACGATCAATACAAGCTTATAGACTTTCCGATATTGGATAAGTATTTGGAATTAATATCT  
GAGGGGTCCTTAAAATGTATTGTACGTGTATCTCTGGATTATGTGTCTCACTTCAATTCA

ATAAAAAATCGCACTAATATCTTGACGTAATTCCACATGAAAAGACAGCAGCGGTACATA  
GCAAGCATTTTGAACCAGAATCGCCATTAGTAGACACCTTAAGTACCATTATTCTCGC  
CTGGTAGCTGGTGGATTTTGCAAAACTGAAGCTGAATTCTACCACTTAAATATGATG  
GAAGATCTTAAGCGTCAATGGAACAGCGAGAAGGACGTCACACTGACTATGCACCACATG  
CTGGCGTGCTTCTTTGTTATAATTAGT

#### EsigIR75a

CTAGATCTCATCCAACAACAACATAATTTTACTTTAAAAATATAAAGTAGTTGATCGCTGG  
GTTGGACCAAGGGATAATACCACTTCCATTGAGAGCCTCGCCCGGACCATGGCTCACAAT  
GAGGCAGACGTAAGTTCCACGTGTTTGCGGTTGTTTCAGTGAACGTTTGACCTGGTTTGAT  
GTACTCATGCCGCATCTCACAAAATTAGAGACGCGACTGTATTATCGCATCCCTGACGTG  
GTTATTGGCAATTACGACAATGAGTTTGCACGTCCATTC

#### EsigIR14

CTGCGCGCCGTGAGCGTGAGGGGCGAGGCGGGCCGGCCGCGCGTGCAGTTACGGCCGAG  
GGCGAGCTGCGCGCGGCCGACCTGCGCGTCGTCAACCTGCGGGCCGGTGTCGGCGAGCAA  
TTGCGCTGGGAGGAAATCGGCGTTTGGCAGTCGTGGCGGGCGCGAGCAGCTCGACATCAAG  
GACATCGTGTTGGCCGGGCGGCAGCCACACGCCGCCGAGGGCGTACCCGAGAAGTTCCAC  
CTCAAGATCACCTTCCTCGAGGAGCCGCCTTACATCCAGCTCGCGCCGCCAGACCCCGTC  
AGCGGCCGCTGCCCCGCTCGATCGCGGCGTCTTTTGTGCGGTGCCCTCTCATGCGCCGAC  
CTCGGGGTGGAGGCAAATAACAGCTCGCTGCATCAGTGCTGCTCAGGGTTCTGCGTGAT  
CTGCTTGAGAAGCTGGCTGAGGAGCTGGGTTTCACGTACGAGCTGAGTCGCGTGCGGGAC  
GGCCGCTGGGGTACCATGCAGCGTGGACGCTGGAATGGCCTCGTCGCCGATCTTGTC AAC  
AGAAAGACCGATATGGTATTGACTTCGCTGATGATCAACTCGGAGCGAGAGGCGGCGGTA  
GATTCAGCGTGCCATTTATGGAGACGGGCATAGCGGTGGTGGTGGCGAAGCGCACGGGC  
ATAATTTGCCAACGGCCTTCTTGAGGCCCTTCGACACGGCTTCGTGGATGTTGGTGGGT  
GCAGTCGCCATCCAGGCGGCCACCTTCACCATCTTCCTATTTCGAGTGGCTCTCGCCCAGC  
GGGTTTCGACATGCGCGTGCGCGGCGCTGCGCCGCATCGCTTCTCGCTCTGCCGCACGTAC  
TGGATCGTGTTGGGCCGTGCTCTTCCAGGCGGCCGTCCACGTGGACTCGCCGCGCGGTTTC  
ACGGCGCGCTTCATGACTAATATGTGGGCCATGTTTCGCCGTGCTCTTCCTCGCCATTAC  
ACGGCCAACTTGCCCGCCTTCATGATCACGCGGAGGAGTACCACGAGCTGTGCGGCCTA  
GACGACGCACGGCTCGCGCGCCCGCTCTCCATCCGCCACCGCTGCGCTTTGGCACCGTG  
CCCTGCTCTCACACCGATGCCACGGTCGCCAAGTACTTTCTGAGATGCACGCCTACATG  
TCTAGTTACAACCGGAGCACAGTGGGCGCTGGCGTAAGCGGCGTGCTGTCAGGAGAGCTG  
GACGCGTTTCGTGTACGACGGCACGGTGCTGGACTACCTCGGCTCGCAGGACGAGGACTGC  
CGGCTGCTGACGGTGGGCGCGTGGTACGCGCGCACCGGCTACGCGCTCGCATTCGCGCGC  
AACTCTAAGTACGTGCCCATGTTCAACCGGCGCCTGCTCGAGTTCCGCGAGAACGGTGAC  
CTCGAGCGGCTCAGGAGGTACTGGATGACGGGTACGTGCAAGCCAAATAAGCAGCAGCAC  
AAGTCGTGCGATCCGCTGGCGCTGGAGCAGTTCTTGTCGGCCTTCCTGCTACTGATGGCG  
GGCATCCTGTTGGCGGCGCTGCTGTTACTGCTCGAGCATCTTACTGTGCTTATGCGCGC  
GCGCCGCTCGCCGCTAGTCGCGCGGGATCCTGCTGTGCGCTCGTCTCGCTCAGTATGGGT  
CAGTCGCTGACGTTCCGCGGGGCCGTGCTGCGAGCGGCGGCGGCGGTGCGCGCGGCCGC  
TGCCGCTCAGCGGAGTGCGGCGCGATACTGTGGCGCACGCGGCACGAGCGC

#### EsigIR15

ACGCTGCGCGGAATGTGCCCCGACGCAGATGACAACGAGGGCATTACACTGGAGAGTCTC  
GGTGGAGTGTTTATCGCGACTCTGTTCCGGGCTCGGCTTAGCCATGATCACACTAGCGTGG  
GAGGTCTTCTACTACAAACGCAAAGAGAAGTCCCAGTCCAAAGTGACAGACTTGAAGAAA  
GACACCGGCAAGACGAGTAAAATTGCAAAACCCGCGACAACTTTCGATTCCAAAATGCCA  
AAGAGGAATAAAATC

#### EsigIR16

ATGAGCGTGGGCGTGGAGCTTTTACTTTTCGACAATATGCATCAATGCCACATTTTGCCCT  
GATGTTTTTGAAGAAAATCGTCCATTTCGAGAATACGTTCGATGGCAGATTTGATTATAATT  
CCCGAATCAAAACGTAATTTACACCTATCTTTGTAAAGAAAAGAACTAAATGGGAAACAT  
TTACGTATTGGCACTATTGAAAATTTCCCTCTTAGTTATACAGAGATGGTAAACGGCACT  
CGGGTGGGCAGGGGCGTGGCTTTCCAATTTGTGGACGTTTTGAAACGGAAACTTAAATTC  
ACTTATACTGTGCGGCTTCCCGCACGGAATTGGGAAGGTGGTTATGGGAGGCTGGAAAAG  
TCGTTGCTGGGAATGCTTGCCAATAAACTATAGATCTGGCTGCCGCCTTCCTCCCAATT  
CTAACCGAAGCCCGATCGATAGTCCGATATTCTGTGGCGCTGGATGAGGGCATTGATG  
ATGATGCTAAAACGACCGCGCGAGTCTGCCGCCGGATCCGGTCTGCTAGCACCTTTTGAC  
GAGAATGTCTGGTACCTCATCCTAGTAGCGGTGATAGCTTACGGGCCCTGCATCGCTATC  
ATCACGCGCCTTCGACACTACGTAACGGACGACGACACCGAGCCGCCATAAGCATGGCC  
CACTCCTTCTGGTTCGTCTACGGCTCCTTCATCAAGCAGGGCACAACGATGGAACCCGAG  
TCCAATACAACCCGAATGCTCTTCGCTACGTGGTGGATCTTTATTATACTTTTGTACAGCT  
TTCTACACAGCTAATCTGACAGCTTTCCTAACCTTTCAAAATTCACACTGGATATTGAC  
GGCCCGAAAGACCTTTTGCGCAAGAGCTGGATTGCCAGGGAAGGAAGCGCTGTGGAATAT  
GTCATCGCCAACCCCAATGAAGACTTATATTTCTGAACAAAATGGTCACGTCCGGTCGC  
GGTCGGTACAGCAGGCTAACGGAGGACAAAAGCTATCTAAAGGAATTGACCCGCAACGTG  
ATCTACATTCGCGACAGGCCAAGCGTCAACCACCTAATCTACAACGACTACCGGGAGAAA  
GCACGAAGCGGTGTCGAGGAAAAATCGAGATGTACATACGTCATCACCGCCAACCCCTTC  
ATGATACGATCTCGGGCTTTTCGCTTATCCAATTAACAGTACTTTACCGGCACTGGTCGAT  
CCAATACTAAGATCGTTTTGTGGAGGGTGGCATCGTTGAATACCTCGAAGAGCTAGATCTT  
CCCGCAAATGAGATTTGTCCACTCGATTTGCAATCAAAAGAAAGGCGTCTCCGGAACACC  
GACCTCACCATGACGTACACATTGGCTGGCATTGGTCTCTGCGCAGCAATCGCTGTATTT  
GTAGGAGAGTTGCTGCATCGATATTGGAAGGCGCGACGCGGTGACTACGATGATGAAATC  
GACAATCAGCTGTTAAAAAGAACAAACAAACCAAGTCTAAAATATTTTCGGAGCGTACT  
CGACCTCCGCCGTACGAATCGTTGTTCCGATCTAAAGACAAGAGTTCATTTGAAAACAGC  
CAGAAACGCATCATCAACGGCCGCGACTACTGGGTCATAAAGAATTCCCTGGGCGAGGTG  
CGACTCGTGCCAGTTCGAAGTCCCTCCGCGTTTTCTTTTCAATAA

#### EsigIR17

AGTCGAGACATGGTGAGCCGCGTGATCCAGTCGCTGACGTGCGCGTGGACGACGCGAGC  
GTGAGGCCGGTCTCCGTGACCGTCTTCAAGATGCGCCACGAGGACACCGACGCCAAGCGC  
CGCGAGGAGATGACGCGCGTCCTCTCCAAGCTGCCACTCAAGCACATAGGCGAGAACTTC  
ATCGCCATAGTGACGTGCGACGTGATGGCCGCCATGGCGGCGCAGGCGCGCGCTCCAC  
ATGACGCACGCGCGCGCAATGGCTCTACTTCGTATCGGACACGGACGCACGCGTCGAC  
CAACTCGAGCGCTATGTCCAGTCGCTAATAGAGGGCGAGAACGTGCGCTACGTGTACAAC

GTGACGGACGTCAGCCCCTATTGCGAGAATAGTCTATTATGCTACTGCAAAGAGATGACA  
GCTGCATTTGTGTGGCGCTGGACAGCGCCGTGCAGGACGAGATGGATGTAGCGGCGCAG  
GTTTCCGACGAGGAGTGGGAAGCCATTAGGCCCAACAAATTGCAGAGAAGGGACTTTCCT  
CTCCGCCATATGCAGCAACATATTGCGGATCACAACCGCTGCGGGAAGTGCAGCACGTGG  
CGACTGCGCGCGGGCGACACGTGGGGCGCCACCTACCGGCTCTACGAGGACCCACCGCT  
AACGAGACCGATGACAGTATTACTGATAACACTATCAAGGGAGCCTCTTTACAGCAGAAC  
CTGCTGCAGGTGGGCTACTGGCGGCCGGTGGACGGCCTGAGATTTAGCGACGTCCTGTTT  
CCGCACATCGAGCACGGCTTCCGGGGAAAGGTTATGCCGATCATCACGTTTCACAACCCG  
CCGTGGAGCATTCTGCAGCTTAACGAAACTGGTTCTGTACGAACTACACCGGCTTGACC  
TTCGACATACTCCATCAGTTGGCTAAGAATAAAAAATTTTACGTTGGGTCTCCTGTTCCCT  
AGTGACATTAAGCAGGATACCAATGATACGATCAAAGAAGGCATACTCACGGCGGATGCA  
ATAGCGTCGGCGCTGGCTGTGTGCGCGGGCAGGTCGCCATAGCGGCGGCCGCTACACC  
GTCTCAGAGAATCTATTGCCGGCACGAACTACACTAGCGTCATAAGTACGCAGCCGCAC  
GCCTTCATCTTGGCGAGACCTCGCGAGTTGAGTCGCGCTCTGCTCTTCATGTGCGCGTTC  
ACGTCTGACACTTGGCTCTGCTTAGGCTTCGCAGTTGTGCTGATGGGACCTACGCTATAC  
GTTATACATCGTCTCAGTCCATTTTACGCGGAGAACAACCTGAACAACAGGCGGGGAGGT  
CTGTGCACTATTCAAACTGCCTCTGGTACATGTACGGAGCCTTGTTGCAGCAGGGCGGC  
ATGCACCTCCCCAAGCCGACAGCGGTGCGCTGGTGGTGGGCACGTGGTGGCTGGTGGTG  
CTGGTGGTGGTGACAACATACTCGGGTAACCTGGTCGCCTTTCTCACATTCCCCAAAATC  
GAGGTGCCCATTACCACCATCGCCGAGCTGCTGAGCCACAGCGATAACCATTACCTGGAGT  
CTGAGGAAGGACACGTATTTGGAGATGCAGTTGAAGGAATCTCTGGAACCAAAATACAAA  
GCACTGTTAGCTGGCGCACGGCTCCTGCCCCGAGGGCACCTGCCGATGGAGGGCGCGGGC  
GATGCGGAGACGGAACGCGTGCGTCGCGGCGGCCACGTGCTGCTCGACTGGAAGATGCGA  
CTCCACTACCTGATGCGGCGCGATCATCTGGAGACTGACACCTGTGACTTCGTACTCAGC  
TTGGATGAATTCATGGATGAGCAGATGGCGATGATAATGCCTGCAAACAGCCCGTATCTT  
CCAATAATTAATGAAGAAATAAAGCGCATGCACCAGATGGGCCTGATCCACAAGTGGCTG  
TCGCAGTACCTGCCGCGGCGGACCGCTGCTGGAAGAGCTCAACCAAGCTGACCACGGAG  
GCGAACAACCATAACGTC AACATAGACGACATGCAGGGTTCATTCTTCGTACTCATCTTG  
GGTTTTCTGACATCAGCATTCGTTTTGGTGATAGAATGGTATTATATGCGGTGGAGGAGG  
AGGCGCGAACAGACCATCATCAAACCGTTCGTTCAATGA

#### EsigGR4

CAAGGCGTCCAGGACACACTGCTATCCATCGACATGCTGACAGCCGATCGTCCCACGCAG  
AAAGAGGTGGATCATTTTCATCCAGGCAATCGAGATGAACCCCGCCATCGTGAGCCTGAAA  
GGCTACGCCCACGTCAACAGGGAGCTCTTGACATCGGCCATGAGTACGATAGCCATCTAC  
CTGATCGTGCTATTACAGTTCAAGATCTCCTTGCCGAAGGAAGCC

#### EsigGR5

CCGGCGGTGGAGCTGCTGCACTACCAGCAGGTGCTACTTCGACGTGCTGCGCGCGCTCTC  
GACGGCGGCTGCGGCCTCGTCAACACCGCCGCGCTCATCTTTTGCATCGCCGAGATTACT  
GTTTCGATCTACTACACTATTACCGATTTGGGTTTTTCGTACATAAATTCGATGATTGTA  
AACGTACAATGGATTGCCATGCACGCGGCGACCCTTATTCTGCTGGTGGAGCCGTGCCAC  
AAGTACGGTTTGGAGGATTTGGCAATAAGCCGAAAACCTGGAAATGATAGTGCTGCGCTTC  
GAGTTGGCGATGGCTGGCGACTCTTACTGGCCGCGGAGCGTCGGGTCAACGCCTTCTGG

CGTCGCCGGCCCACTTTCCGCGCCGCCGCCGCCCTCAGCGCTATGGGCATCTGCGTA  
CTGCAAAGAAAATTACTGCTCTCGATAATATCAACGGTAACAACATATCTCATCATTTTG  
TTACAAGTGAAAGAC

#### EsigGR6

AGGCAAAATCTTAAAAAAGGAGACTTAGTTCTCATAAACTCCGATGCACCACCTTTGCAG  
TGGCCGTTAGCGCGCGTAGTACGACTACATCCCGGCCCTGATGGCACCGTGCGCGTCGTT  
GACGTTTCGGACCACGAACAGCGAATTCACTCGACCTGTTTCAAGGCTCAGTCCTCTGCCA  
TTAAATGAGGACGAAGATATAGCTTAG

#### EsigGR7

ATGAGGAGACTATTGCATAATAATCCGGTGCAAGAAAAGAAAGTGAACGACGGAAGTCCT  
AAACCAACACCGAGTAATTCGTTCAACATAAGCGGAGAGCTGATGGTATTTGTGAAGGTA  
CTGCGGGCGGTGGGCATGGCCCCGCTGCGTTGTGAGCAGGAGTCCACTGGGCGCTGGCGC  
ATCACCACGTCCCTGGCGCTGCGGTTCTACAGTTGGATATTTATATTATTGTTGTGTTG  
GTGTGACATACGCATTCTACGTACAGACGACACTGCCGGAGAAGGGTAGCATGGCCGCG  
CGCCTCGTCAACCTGATGCAGTTCATCGCCATGAACTCCTGCCTCCTGGCCACCGTCTTC  
ACCATGCCCCCTCAGGACTAGGACACTCGTGGAGTATGTCGACACTATGTCCCAATTGCAT  
GACCGCTTCAGCAAGGACGAGTTCAAGGTATCGAACTGCAGGATGCTGGGACTGCTGCTC  
GTTTCCCTCTTGCCCTTCGTGCTGGTATTGGTGCAGGAAACCGCGGATAACGTACTCGAC  
CAACCCGTTGTAGATGCAAAGACTATACTCTGCTACGTGCCGTCGCCAATACTGTACATG  
TTGTGTCTAATGATGGAGGGGGAATTTACATTCCTGGTTTGGCTGCTGGAGAGTCGCGCT  
GAAGCCGTCATCAGGCGAATCGACAACCTCCTCAAGCAAGGAGAGAGGCACAGGTGGCGT  
GACACCAACCATGTGCTGCAACGCATGCAGCAGCTACATGAACTGCAGGTTGCGCTGCGA  
AGGTGCGCTGGCGTCATCAACGCTGCCTTCGGCCTGCCCATGCTCATCGCTGTTGTTTTT  
ATCATGATCGAGATCATCATCGCCATTTACTATATGATCGTTGATCTAGATCATTTTGGT  
GTTTCGAACTTTTCTGTTGAACCTGCAATGGATTTTGATTCTGGTGTGGTGGCTTATGGTG  
GTAATAGAACCTTGTCACCAGTACGTTGAAAAGGATCAGGTAATATCTAATCGAATCAGC  
AAAGTGATCCTGAAGCTAAGCGAGTCTAAAATCTTCAACTGCGACTGGCGCGACGAGAAT  
CAGATCAAGATCTTTAGGGCCCAGCAGGTCCTCTTCAGCAGCACGGAGGTCAACATTACG  
GCACTCGACGTCTGTGTCATGAGAAGATCTCTCTTGGGATCGATCGCTGGAGCTGTTACT  
ACTTATCTTGTCATTCTGCTTCAGTTAAAAGATACAAAAATTTAA

#### EsigCSP1

ATGAGTCCATTGACAGTGGCGTGCCTACTAGCGGCAACATGTTTTGTGCACGCGGCCCG  
GAACACTATACGAGCAAGTACGATGGCATCAATTTGGATGAGATCCTCGCCAACCGGCGC  
CTCTTCGTGCCCTACATCAAGTGCATCCTCGACCAGGGCAGGTGCACTGCCGAGGGCAAG  
GAGCTTAAAGCACACATCAGCGATGCGTTGCAGACGGGCTGTAGCAGCTGCACGGCGACG  
CAGCGCAAGGGCGCTCACAAGGTCATCGGACACCTCATCCACCACGAAGGCGAGTTCTGG  
CAGCAGCTGGTTGACAAGTACGACAAGACGCGCCAGTACACGCGCAAGTACGAGCACGAG  
CTCAAGAGCATTGCCGCGTAA

#### EsigCSP2



ATGTTACTGCGTAATAGAGTGGGTGTGGTCGCGCTGGTGGTGCTGGCGGGCGGGCAGTG  
GCCACGGCGGGCGCAGACCCGCTACTCGGAGCGCTACGACCAGGTGAACGTGGGCGAGGTG  
CTCGCCAACCGCCGCCTCTTCACGCCCTTCGTCAACTGCATCATGGACCGCGGCCGCTGC  
ACCGCACAGGGCCGCGAGCTAAAGAACCACCTGGCGGACGCGCTGCAGAGCGGGTGC GCG  
CGCTGCTCGGCCAAGCAGCAGGCGGGCGCCACGCTCGTCATCCAGCACCTGATCCACCGC  
GAGCCGGCCGTGTGGCGTGAGCTGACGCGCAAGTACGACCCGTACGCCATCTACCGCAAC  
AAGTACGAGGCCTTCGCCGCCTCTAAAGGCATCACGCTGCCC

#### EsigCSP7

ATGAAGTCGACTCTTTGCATTGCGATACTAGCATGTGGCGTTCTAGTGACGGCTCAGTTC  
TACAGCTCAAAATTTGAGACCATCAATGTGCAGGAGATTATAGGCAACAAGCGCATCCTT  
CAAACTACATCAACTGCTTCCTCGACGCCGGCAACTGCGCACCCATTGCTAAGGAATTG  
AAAGATCTGTTGCCGGAAGTACTGGCGACGACATGCGGCAAGTGTCCCCGAAGCAGAAG  
GAGATCCTCCGCGGACTGTGCTGCGCCCTGCAGAAGCAGGTGCCCCGCGACTGGGCAAG  
ATGCAGAAGAAGTATGACCCCGGTAGCAAGTATCAAGTCTCCTTCAATAAGTTCCTCAAC  
TGCTAG

#### EsigCSP9\11

ATGGGCGTGTACGCGGCACTGGTGGCGGGCGGCTCTGTTTCGCGTGCGCAGCGCGAGCACAG  
CGCGACTCGCGCTACGACTCCCGCTACGATTACCTGGATGTGACGCCATCCTCGACAGT  
CGCCGCCTCGTGCGCAACTACGTCGAGTGCCTCCTCAACAGGAAGCCCTGTTACCCGGAG  
GGCAAGGCGCTCAAAAGAATATTACCAGAAGCCCTTCGCACCAAGTGTGCAAGATGCACT  
GAACGCCAGAGAGAGAGCGCAGTGAAAATTATCAAAAGACTGAAAAGTGATTACCCGGAC  
GAATGGTCAAGGTTGGCGGGCCGTTGGGATCCCAATGGAGACTTCACAGCATATTTTGAA  
CATATAGTTGCCAAGGAGGACAAGAACCAAATATCGGGCAGCAAATTAGTACCTCAGGCC  
ACTGGAATTGCTATAACAAATATCACTGCTCCAACAAATTTAGTGCCTTTGCGACCTATT  
GTACTAACAAGGTAA

#### EsigCSP10

ATGTTTCGGCCAGGTAATAGTGGTGTATGGATGCTGGCGTACGCGTACGCGGGGAGCGGC  
GAGGGATTTTCCACGAAATACGATAACGTCGACCTTGACCAGATCCTCACCAACGAGCGC  
CTGCTCACCAGCTACGTCGCCTGTCTCCGGGACCAGGGTCCGTGCTCGCCCGACGGCAAC  
GAGTTGAAGAAGAACTTGCCGGAAGCGGTGAGGGATGACTGCAGACGATGCAGCGAAACA  
CAGCGGCGCGGCTCGGCGCGGGTCATGCGCTACCTCATCGACCACCGGCCTGAGGACTGG  
ACACAGCTTGAGAACTTATACGATCCAGAAGGTCTGTATAAGAAAACGTTACTTAAAGAGC  
GCAGAGCTCGCCACAAACGAAGAGGAGAATTCCAGCCCGACTACTGAGAAGGCCTGA

#### EsigCSP12

ATGCAGCCCACAATTCTGTTTATCTGCTGCGTCGTCATCGCTGCATCAGCTTCAGCAGCT  
GTAACACCACGTCCCGCCGTATCCGATACAGCACTTGACAACGCGCTGCAGGACAAGAGA  
TACCTCATGAGACAGCTTAAATGCGCTTTGGGTGAGGCACCTTGTGATCCCGTTGGGAGA  
AGATTGAAAAGCTTAGCTCCATTGGTACTTAGAGGTTTCGTGTCTCAGTGCACGCCGCAG  
GAGATGAAGCAGATCCAGAGAACTGGGACACGTACAGAGACATTATCCCAAAGAATGG  
GCTAAGATGCTCAAACAGTATGCCGGAAGTAA

#### EsigCSP13

AACGTGACCAACGTGCGCAGCCTCGTCTACTGCTTCCTCGAGGAGGGCCCTTGCGATCCC  
TTCGCCAAACACATGCTAGACATCTTGTGGGAGGCGGTAGAGACAGAGTGACGAAATGC  
AATCCGAAGCAGGTGGAGCAGTACGAGAAGGCGATGATTGCTATATACAAGCTGTATCCC  
AAGGAACACAAGAGAATTGAAGACAAGTATGACCCGGAGAACAAGTGCACTGCCATTAAA  
GCTTTGTTAGAGAAAGCCATTGATTTATGCGTAAATTAA

#### EsigCSP14

ATGAAGGTAGTTATCGTCCTGATGATGTGCGCGGTAGCGGCTCTATCAGCCCCGGCCGAC  
AGTCCCTGAGAAGTACACAGACCGCTACGACAACATTAACTAGACGAGATCCTCAGTACT  
AAACGTCTGCTAATCGCCTACGTCAAGTGCGCCGTCGACAAGGGCCGCTGCACGCCCCGAG  
GGGAAGACCTCCGAGATCACCTTGAAGACGCACTGAAGACTGGCTGCGCCAAGTGTACG  
AAGGCGCAGGACGAGGGCGCCGACCGCGTCATAATTACCTCATCGAGCACGAGCCCCGAG  
CTCTGGAAGGAGCTGGTCGAGTTCTACGACAAGGACGGTACTTACAGGAAGACTTACGAG  
GACCGCGCACGCGCCAAGGGCATCACCATCCCTGCATACTAA

#### EsigCSP15

ATGTTGGTCGTCGTAGTGGGAGCGTTTCGCCATTGACACGGCCTTCGACGACTACGACGTA  
GACAGTTACGTGGCAGACGTGACCAGCGTGCGCAGCTTCGCCTACTGCTTCCTCGAGGAG  
GGCCCTTGCGATCCCTTCGCCAAACACTTGCGAGACAACCTTCTGGGAGGCGGTAGAGACA  
GAGTGCAAGGTATGCAATCCGAAGCAGGAGGAGCAGTACCTGAAGGTGATAGCGGTTATA  
TACAAGATGTATCCCGAGGAACACAAGAGAATTGCAGACAAGTACCGGTATGACCCGAAG  
GAAAAGTACCGCATTGTCAATTAG

#### EsigCSP16

ATGGCCTTAGAGACGTTTTCACTCGAAAATCCACTTTTCCGTACCTATCTTGTTTACTCA  
TCAATTCTCGTTTTTAAAAATGTTGATCATGTCTGTTTTGACCGCACGGCAGCGTTTTAGG  
AAAGGGGTATTTGCCAATGCCGAAGACGCTAAAACTCCAAAAGCAAAGGTCAAGTACGAT  
GATGTTGACGTGGAACGTGTTCGAAGAGCTCATCAGAAAGTACTGGAAAATATTCCAATC  
TTCTCGTGATAACTTCCATGTATATACTGATTGATCCACCAGTATTCTAGCGACCAAC  
CTGATCAGGTTGTTACAGCAGGACGAGTGCTTACACTTTGGTATATGCTGTCTGTCCC  
GTTCCACAGCCTGCACGTGCTTTGGCTTGGGCTGCTGGTTATTTTACCCTATTTTTATG  
GCCACTTCCGTATTTATAAAATTTATATCTGATTTGTAA

#### EsigSNMP2

ATGAAGCTCCAAAGGCACATGAAGGTGGGACTTGGTTCGGGCGGTGCGGCCGCGTTTCGGC  
GCCCTCTTCGGCTTCGTCGCCTTCCCCGCCCTCATAAACAGCGGTCTTAAGAAGGACATG  
TCGCTCTCCGAGAAGAACGATATCCGCGGCATGTGGAGCAAGGTGCCGTTTCGCGATCGAT  
TTCAAGGTCTACCTCTTCAATTGCACCAACGCTGAGGAGGTACAGAAGGGCGCCACGCCG  
GTGCTGCAGGAGGTTGGGCCTTACTACTTCAAGAATGGAAAGAGAAGGTGAACCTGGAA  
GACGTGGAGGACGAGGACGCCGTCATCTACAACCGCAGGGACACCTTCTACTTCCGGAAG  
GAACTATCAGGGCAAGGACTGACTGGAACGAAATGATAGTCATGCCGCACGTGATGATG  
CTGTCATTGGCCATAGTAGTATCAAACGAGAAGCCGGCCATGCTGAATATGGTCGGCAAA

GCCCTCAACGGAATATTCGACGAGCCAAAGGACGTATTCCTGCGCGCGCGCGCCATGGAC  
ATCATGTTTCGACGGCGTGGTCATCAACTGCGCGAGGACAGAGTTTCGCGCCCAAGGCCATC  
TGCACAGCCATCAAGAAGGAGGCCAGCAATCTGGAGTTCTTGCCTGGAGACCAGTTCAAG  
TTCTCGCTGTTTGGGATGCGCAACGGTACCACGGACAATAAGGCCATAAAAGTGCCTCGC  
GGGATCAAGGACATTATGCAGGTGGGCCAGGTGTTTCGGCGTGGACGGCGAGGACGAGCAG  
AGCGTCTGGGCGGGGAGCCCTGTAACCAATTTGCCGGTACCGATGGTACCATTTTCCCG  
CCCTTCCTCACTTACAAGGACAAGCTGGAATCGTTCTCGCCCGATATTTGCAGAACTGTT  
CGCCCCGAGTTCCAGAAGTTTACCTTGTAACAAGGCATTCCGACGAACCGGTACGTCGCC  
ACCCTGGGTGATCTCGGCAACGATCCAGGCCTCAGCTGCTTCTGCGACGCGCCCGACAAG  
TGCCCTAAGAAGGGTCTCATGGATCTCTTTAAATGCATAAAGGCACCGTTAGTTGCATCT  
CTACCGCATTTTCTGGAGACGGACCCGTCGGTGTTAGCTGGAGTCAAGGGTCTGCATCCG  
AACGCTGAGGAGCATAGCATCTATATCGACTTCGAACCGATAACGGGTACGCCGATGGTT  
GCACGACAGCGCCTCATGTTTCAGTATACAGCTGAAGACTATCGGCAAGCTGGAGCTTTTC  
AAGGAACCTCCCGGCTCGCTGGTGCCACTGTTCTGGGTGAAGAGGGTCTGGCCTTGAGT  
GAGGGCTTCGTCGGTGTATTAATCGCATCTCTTCACACCGAAGCGCGTGGTCGGTGTC  
ATGAAGTGGCTTCTGGTCAGCTTTGGCTCTTTGGGCCTCATCGGTTCTGCGCTGGTGCAT  
TATAAGGACAAGATAATGAAGTTCGCCATCGCGCCTGACGCTCCCGTGTCCTTGCAGAAG  
AAAGAAGGAAAGGAATTAAGTACTATAAGCAATTAA

#### EsigSNMP3

ATGTGGATCTTGCTAGGATCTGTGGCGTTCTCGTTTTTCGCCATAATAATGGCAGCCTCA  
GGATTTCCGAATTTGGTTAAGCAACAAGTTAGTAAGGAGTTGGCTATAAGAAACGACTCG  
TCAAAGTTTGAGTTCTGGCGTAAACTGCCCTTGCCGCTCAGCTTCAAAGTCTATTTGTGG  
AACGTGACCAATCCGGAGGAGATCACGGCCGGCTCTAAGCCAAAACCTAAAGCAGGTCCGGC  
CCCTATGTTTACGACGAATACAGAGAAAAGACTGTTTTGGGTTATAGAGAAAATAACACA  
GTGGAGTATACCGAGAAGAAAACATACATTTTAAATAAGAGAAGTCTGGAACGTGTACT  
GAAGATGATCAAGTAACTGTCATTAATCTCATATTTATGACAGTGATGCTGAAACTAAAT  
GAACTGATGCCATCTATGATGACCATGCTCTACAAGGCGATGCCGCTTCTTTTTACCGAC  
CTGAAGGATCCCTTCTTGCGTGCTCGTGTCGGCGATATACTTTTCAATGGAATATTCCTC  
GATTGTGGAGGCAACGAGACGACTCTCAAACCTGGTATGCGGTCAAATTCAGGACGAGGCA  
GTGCCAACTTTGAGGAAGGCCGATGATGGCAGAAATGGATTTTTATTTTCCATGTTTCAT  
CATCTTAACTCGACGCCTGCCGGTCCTTTCCGCGTGGATCAAGGGGTCAAGAATATTAAG  
GACGTTGGTCAATAGTGACTTACAAGGGCGAGCCGGACATCGACATATGGAGCGAGCCG  
ACCTGCTCCATGATCAACGGCACAGACGGCACCATCTTCGCGCCGATCGATCGCTCCAAC  
ATTACTGATAAGCTGTACTTGTTTTCAAGGAGACATATGCAGATCGATCTACATATCGCTC  
TTTGGCGAAACAAAAACTTTCAACATGCCTACTTTTCGATATGAAAAACACCAGAGAATTG  
TTTGCGTCAAAGAGTGCCGTACCTTCCAACAAGTGCTTCTGTAAAAAAATTGGATCAGT  
AACCATGATGGATGTCTAATGAATGGCGTCTCTGATTTGGAGATGTGTCAGAAGGCTCCA  
GTAATGGCCAGCTTCCCCCACTTCTATCTAGCTAGCGAGGAACTCCTTGAGTACTTCGAG  
GAAGGAGTGGAACCAGATAAAGAAAAGCACGGTAGCTTTGTGGAATTAGAGCCGATTACC  
GGTACGGTATTGCGTGGAGCACAGAGAGTTCAATTCAACATAGAACTGCGCAAAATGGAA  
AATGTTCCATCCTGGACTCCGTTCCAACCTGGGTATTTCCGTTGCTATGGATTGAGGAG  
GGTGCCGAAGTAGATGACAAAATTATAGCCATGCTAAGCGACGTACACCGCGCGCTGCGC  
TACGTGGAAGTTGCTCGTTGGGTCTGCTAGCTGCAGGCTTGGTGCTGCTCTCGGCGCA

GGCGTCGTCTACATTCGTCGCCACTACGCCCTCTGTGGAGCTACAAGCAGCGTCACCTTC  
GTCGTGGATCAGCACCAGCTTAATGGCAATAAGAATCTAGCTTTCGTCGAAGACAGTAGG  
AGCATGTAG
