# Supplementary material for: A Study of Adult Olfactory Proteins of Primitive Ghost Moth, Endoclita signifer (Lepidoptera, Hepialidae)
Source: MDPI journal article supplement (doi:10.3390/life13122264), 2023-11-27
Supplement: s1 [file s1]

# A Study of Adult Olfactory Proteins of Primitive Ghost Moth, *Endoclita signifer* (Lepidoptera, Hepialidae)

Guipeng Xiao <sup>1</sup>, Jintao Lu <sup>2</sup>, Zhende Yang <sup>2</sup>, Hengfei Fu <sup>2,\*</sup> and Ping Hu <sup>2,\*</sup>

**Additional file S2** The protein names and gene accession numbers were used in phylogenetic trees

| OBPs          |          |               |           |               |           |
|---------------|----------|---------------|-----------|---------------|-----------|
| OBP           |          | OBP           |           | OBP           |           |
| Accession NO. | Name     | Accession NO. | Name      | Accession NO. | Name      |
| AAF06123.1    | SexiPBP  | AAF06124.1    | AvelPBP3  | ABY71034.1    | PxylGOBP1 |
| AAF06144.1    | CmurPBP4 | AAC36315.1    | HzeaPBP   | ABY71035.2    | PxylGOBP2 |
| AAF06143.1    | YcagPBP  | BAF64703.1    | AselPBP2  | ACI28451.1    | PxylPBP1  |
| AAF06142.1    | SexiPBP  | AAX85460.1    | AsegPBP2  | AEB54587.1    | HarmOBP6  |
| AAF06141.1    | PgosPBP  | AAX85459.1    | AipsPBP2  | AEB54584.1    | HarmOBP4  |
| AAF06140.1    | CrosPBP1 | AAX85458.1    | AipsPBP1  | AEB54582.1    | HarmOBP3  |
| AAF06139.1    | CrosPBP2 | AFD34183.1    | AconPBP2  | AEB54581.1    | HarmOBP5  |
| AAF06138.1    | CpinPBP1 | AFD34183.1    | AconPBP3  | AEB54580.1    | HarmOBP1  |
| AAF06137.1    | CrosPBP  | AFD34176.1    | AconPBP1  | CAC08211.1    | HarmGOBP2 |
| AAF06133.1    | CparPBP2 | ABY71034.1    | PxylGOBP1 |               |           |
| AAF06132.1    | CmurPBP1 | ABY71035.2    | PxylGOBP2 |               |           |
| AAF06131.1    | CmurPBP2 | ACI28451.1    | PxylPBP1  |               |           |
| AAF06130.1    | CmurPBP3 | AEB54587.1    | HarmOBP6  |               |           |
| AAF06129.1    | CfumPBP1 | AEB54584.1    | HarmOBP4  |               |           |
| AAF06128.1    | CfumPBP2 | AEB54582.1    | HarmOBP3  |               |           |
| AAF06127.1    | CfumPBP3 | AEB54581.1    | HarmOBP5  |               |           |
| AAF06126.1    | AvelPBP1 | AEB54580.1    | HarmOBP1  |               |           |
| AAF06125.1    | AvelPBP2 | CAC08211.1    | HarmGOBP2 |               |           |

## Orco

| Orco           |          | Orco           |          | Orco           |          |
|----------------|----------|----------------|----------|----------------|----------|
| Accession NO.  | Name     | Accession NO.  | Name     | Accession NO.  | Name     |
| NP_001296031.1 | PxyOrco  | XP_039752153.1 | PageOrco | XP_014363049.2 | PmacOrco |
| NP_001299600.1 | AtraOrco | QRF70964.1     | ScinOrco | XP_045516753.1 | PbraOrco |
| XP_021195606.1 | HarmOrco | XP_034828070.1 | MhypOrco | XP_045503131.1 | CcroOrco |
| XP_053617456.1 | PintOrco | XP_038212518.1 | ZcesOrco | XP_045486972.1 | PrapOrco |
| XP_023942390.2 | BanyOrco | XP_030036707.1 | MsexOrco | XP_045453871.1 | McinOrco |
| XP_052751921.1 | GmelOrco | GBP69367.1     | EjapOrco | XP_032527723.1 | DpleOrco |
| XP_050667777.1 | LsinOrco | XP_028178675.1 | OfurOrco | ARO76408.1     | CpunOrco |
| XP_050552928.1 | SfruOrco | XP_028043387.1 | BmanOrco | QKZ93458.1     | AlepOrco |
| XP_050353359.1 | NioOrco  | XP_026726946.1 | TniOrco  | ON420156       | MlorOR33 |
| XP_049879122.1 | PgosOrco | XP_026490757.1 | VtamOrco | QNS36226.1     | MsepOR33 |
| AKW50880.1     | EobiOrco | XP_026333801.1 | HkahOrco |                |          |
| WCC57650.1     | PxutOrco | XP_022831582.1 | SlitOrco |                |          |
| WCC57583.1     | PpolOrco | AJF20962.1     | ObruOrco |                |          |
| WCC57335.1     | PdarOrco | XP_047538427.1 | VataOrco |                |          |
| WAW99989.1     | SfurOrco | XP_047511461.1 | PnapOrco |                |          |
| XP_037974487.1 | PxylOrco | XP_047033069.1 | HzeaOrco |                |          |
| QZH55165.1     | AyunOrco | XP_046963887.1 | VcarOrco |                |          |
| XP_041972175.1 | AageOrco | XP_045770122.1 | MjurOrco |                |          |
